# Supplementary material for: Ammonia fluxes and emission factors under an intensively managed wetland rice ecosystem
Source: Royal Society of Chemistry journal article supplement (doi:10.1039/d0em00374c), 2020-12-11
Supplement: d0em00374c2.pdf [file d0em00374c2.pdf]

*Supplementary data 1 Diagram of NH<sub>3</sub> collection mechanism in situ in the field by chamber-based technique*
