# Supplementary figures and images for: Ammonia fluxes and emission factors under an intensively managed wetland rice ecosystem
Source: Royal Society of Chemistry journal article supplement (doi:10.1039/d0em00374c), 2020-12-11

Suppl. 1

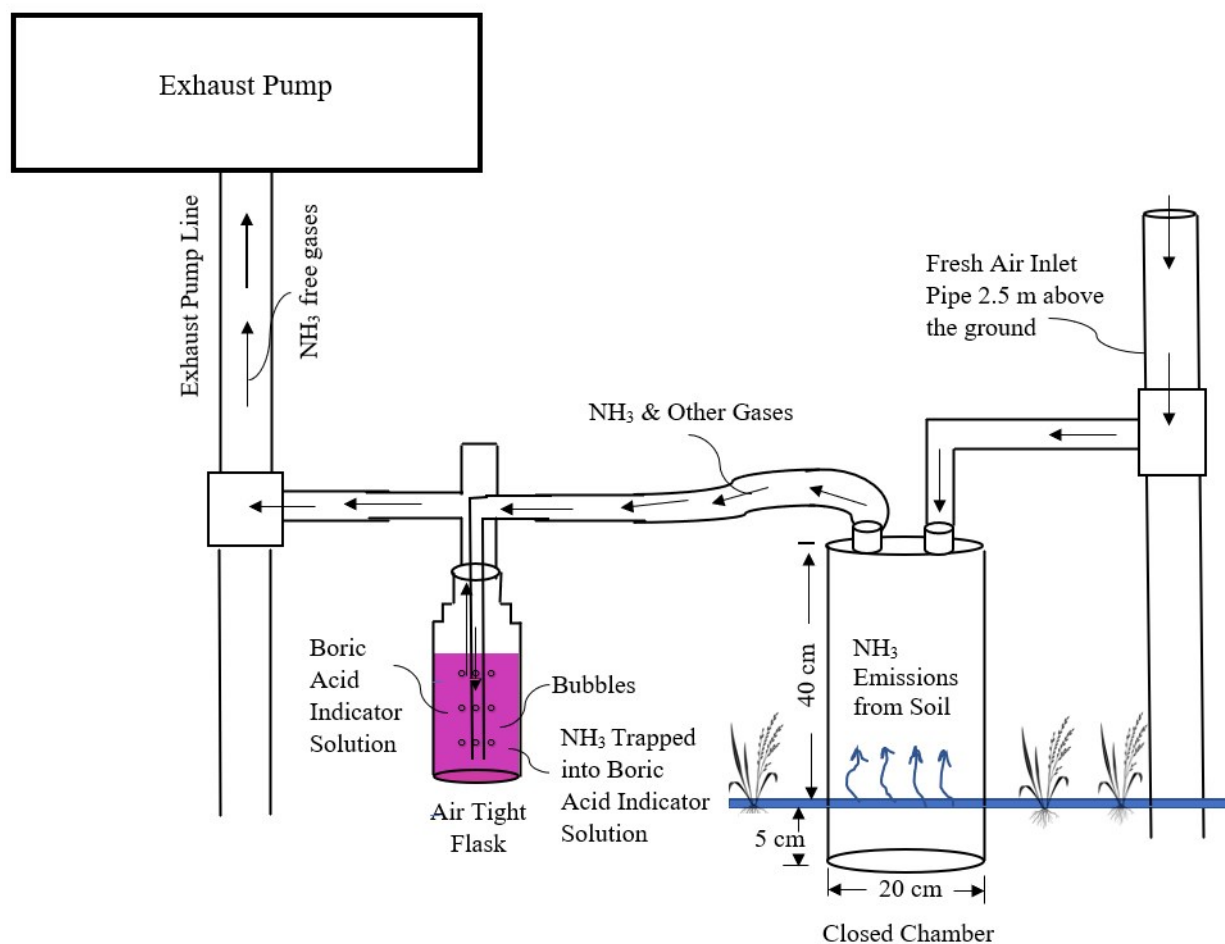

Supplement: d0em00374c1.pdf [file d0em00374c1.pdf]
